# Supplementary material for: 'Online' integration of sensory and fear memories in the rat medial temporal lobe
Source: eLife journal article supplement (doi:10.7554/elife.47085), 2019-06-10
Supplement: supp [file elife-47085-supp-v1.zip]

Archive with 5 entries (5 files):
- elife_poa_e47085_Figure_5_source_data_1.xlsx
- elife_poa_e47085_Transparent_Reporting_File.pdf
- elife_poa_e47085_Figure_4_source_data_1.xlsx
- elife_poa_e47085_Figure_1_source_data_1.xlsx
- elife_poa_e47085_Figure_2_source_data_1.xlsx
