# Supplementary material for: 'Online' integration of sensory and fear memories in the rat medial temporal lobe
Source: eLife journal article supplement (doi:10.7554/elife.47085), 2019-06-10
Supplement: supp [file elife-47085-supp-v1.zip › elife_poa_e47085_Figure_1_source_data_1.xlsx]

## Sheet: Fig 1
PP
	S2 BASE	S2 Test		S1 BASE	S1 Test
A1	0	35.8333		0	82.5
A2	11.6667	27.5		0	75
A3	5	23.3333		0	97.5
B5	0	8.33333		0	62.5
B6	0	17.5		5	82.5
a1	0	25		1.66667	60
a2	0	22.5		5	100
b7	0	4.16667		0	72.5
b8	0	6.66667		0	22.5
c1	1.66667	46.6667		0	80
c2	0	26.6667		3.33333	40
d7	1.66667	22.5		3.33333	67.5
d8	3.33333	14.1667		0	50
AVG	1.79487	21.6026		1.41026	68.6538
SEM	0.933347	3.28417		0.561279	6.09497
UP
	S2 BASE	S2 Test		S1 BASE	S1 Test
B1	0	2.5		0	40
B2	0	5		0	57.5
B3	20	2.5		0	77.5
B4	8.33333	3.33333		40	75
D1	0	15		6.66667	17.5
D2	0	5.83333		0	47.5
D3	0	17.5		6.66667	87.5
D4	3.33333	8.33333		3.33333	67.5
a5	0	14.1667		1.66667	25
a6	8.33333	8.33333		6.66667	52.5
b3	0	4.16667		0	32.5
b4	0	31.6667		3.33333	27.5
c5	0	6.66667		0	50
c6	0	7.5		0	72.5
d3	0	13.3333		0	57.5
d4	0	1.66667		0	80
AVG	2.5	9.21875		4.27083	54.2188
SEM	1.36931	1.93121		2.47192	5.37509
PU
	S2 BASE	S2 Test		S1 BASE	S1 Test
C1	0	5		0	0
C2	0	10.8333		0	2.5
C3	0	12.5		0	0
C4	0	9.16667		0	7.5
D5	0	8.33333		3.33333	47.5
D6	0	1.66667		1.66667	12.5
D7	0	2.5		0	22.5
D8	0	10		0	2.5
a7	0	9.16667		5	15
a8	1.66667	20		0	0
b1	0	16.6667		11.6667	10
b2	0	3.33333		26.6667	35
c7	0	5.83333		0	0
c8	0	15		0	0
d1	0	5.83333		0	25
d2	0	1.66667		0	15
AVG	0.104167	8.59375		3.02083	12.1875
SEM	0.104167	1.3666		1.75607	3.54197
