# Supplementary material for: 'Online' integration of sensory and fear memories in the rat medial temporal lobe
Source: eLife journal article supplement (doi:10.7554/elife.47085), 2019-06-10
Supplement: supp [file elife-47085-supp-v1.zip › elife_poa_e47085_Figure_2_source_data_1.xlsx]

## Sheet: Fig 2
VEH
	S2 BASE	S2 Test		S1 BASE	S1 Test
A1	0	36.6667		0	70
A3	0	33.3333		0	47.5
A5	3.33333	18.3333		0	95
A8	0	15.8333		1.66667	42.5
B5	0	19.1667		0	55
B8	11.6667	61.6667		50	57.5
C2	5	31.6667		0	20
C5	0	15		0	27.5
AVG	2.5	28.9583		6.45833	51.875
SEM	1.47734	5.5607		6.22365	8.39523
CHX
	S2 BASE	S2 Test		S1 BASE	S1 Test
A2	0	13.3333		1.66667	45
A4	0	16.6667		0	77.5
A6	0	8.33333		0	30
A7	0	7.5		0	57.5
B3	0	17.5		0	82.5
B6	1.66667	15.8333		8.33333	52.5
B7	0	10.8333		0	30
C1	21.6667	14.1667		0	87.5
C4	5	1.66667		5	30
C6	0	7.5		18.3333	25
AVG	2.83333	11.3333		3.33333	51.75
SEM	2.15237	1.6015		1.89215	7.52819
