# Supplementary material for: 'Online' integration of sensory and fear memories in the rat medial temporal lobe
Source: eLife journal article supplement (doi:10.7554/elife.47085), 2019-06-10
Supplement: supp [file elife-47085-supp-v1.zip › elife_poa_e47085_Figure_4_source_data_1.xlsx]

## Sheet: Fig 4
VEH							VEH
	S2 BASE	S2 Test		S1 BASE	S1 Test			S2 BASE	S2 Test		S1 BASE	S1 Test
A5	3.33333	34.1667		1.66667	40		A1	0	16.6667		0	55
A8	28.3333	40.8333		21.6667	97.5		A4	5	27.5		3.33333	97.5
B4	0	18.3333		0	70		B2	0	29.1667		21.6667	95
B7	1.66667	12.5		0	85		B3	28.3333	35.8333		10	95
C6	33.3333	24.1667		1.66667	87.5		B5	5	10		0	40
D1	21.6667	18.3333		0	77.5		B7	0	25		0	92.5
D4	13.3333	30.8333		16.6667	95		AVG	6.38889	24.0278		5.83333	79.1667
D6	10	33.3333		10	82.5		SEM	4.50137	3.78482		3.54208	10.2198
AVG	13.9583	26.5625		6.45833	79.375
SEM	4.46478	3.44471		3.0446	6.4391		CHX
								S2 BASE	S2 Test		S1 BASE	S1 Test
PRE							A3	5	23.3333		0	47.5
	S2 BASE	S2 Test		S1 BASE	S1 Test		A6	0	10.8333		0	87.5
A3	1.66667	2.5		3.33333	80		A8	1.66667	8.33333		0	80
B5	1.66667	5.83333		0	32.5		B1	0	10		0	72.5
C3	6.66667	4.16667		0	32.5		B4	0	1.66667		5	90
C7	5	0.833333		0	40		B6	3.33333	19.1667		0	75
D2	0	0.833333		26.6667	77.5		AVG	1.66667	12.2222		0.833333	75.4167
D5	10	0.833333		38.3333	92.5		SEM	0.860663	3.18901		0.833333	6.23888
AVG	4.16667	2.5		11.3889	59.1667
SEM	1.53659	0.860663		6.86398	11.0617
POST
	S2 BASE	S2 Test		S1 BASE	S1 Test
A7	5	11.6667		0	82.5
B3	0	2.5		0	72.5
B6	5	5		3.33333	50
C1	0	6.66667		0	40
C4	0	2.5		1.66667	62.5
C8	8.33333	5		1.66667	57.5
D3	65	21.6667		96.6667	90
D7	0	10		0	80
AVG	10.4167	8.125		12.9167	66.875
SEM	7.87898	2.25347		11.972	6.11917
