# Supplementary material for: 'Online' integration of sensory and fear memories in the rat medial temporal lobe
Source: eLife journal article supplement (doi:10.7554/elife.47085), 2019-06-10
Supplement: supp [file elife-47085-supp-v1.zip › elife_poa_e47085_Figure_5_source_data_1.xlsx]

## Sheet: Fig 5
VEH
	S2 BASE	S2 Test		S1 BASE	S1 Test
A2	0	55		3.33333	87.5
A3	1.66667	39.1667		0	82.5
B1	0	25		1.66667	82.5
C2	0	52.5		3.33333	80
C6	0	47.5		0	40
C8	1.66667	20		11.6667	55
D1	8.33333	61.6667		0	95
D4	5	19.1667		3.33333	70
D6	30	28.3333		3.33333	85
D8	16.6667	39.1667		0	75
AVG	6.33333	38.75		2.66667	75.25
SEM	3.12102	4.81646		1.11665	5.21017
CHX
	S2 BASE	S2 Test		S1 BASE	S1 Test
A5	0	46.6667		25	100
B6	11.6667	40		0	65
B8	5	36.6667		3.33333	47.5
C3	0	40.8333		1.66667	65
C7	0	13.3333		1.66667	87.5
D2	0	46.6667		1.66667	92.5
D5	0	23.3333		1.66667	47.5
AVG	2.38095	35.3571		5	72.1429
SEM	1.70034	4.72755		3.35312	8.08122
BUP
	S2 BASE	S2 Test		S1 BASE	S1 Test
A1	8.33333	22.5		1.66667	97.5
A6	0	24.1667		0	75
B4	1.66667	23.3333		0	67.5
C1	0	10.8333		5	72.5
C4	0	33.3333		1.66667	65
D3	0	29.1667		0	65
D7	0	30.8333		0	80
AVG	1.42857	24.881		1.19048	74.6429
SEM	1.1745	2.80794		0.700933	4.34483
